# Supplementary material for: Presence of Antibiotic Residues and Antibiotic Resistant Bacteria in Cattle Manure Intended for Fertilization of Agricultural Fields: A One Health Perspective
Source: PubMed Central journal article supplement (PMC8069554; doi:10.3390/antibiotics10040410), 2021-04-09
Supplement: antibiotics-10-00410-s001.pdf [file antibiotics-10-00410-s001.pdf]

## Supplementary material

**Table S1.** Number and percentage of 7 ciprofloxacin-resistant *E. coli* isolates and 6 cefotaxime-resistant *E. coli* isolates from 9 fattening calf slurry samples and 7 ciprofloxacin-resistant *E. coli* isolates and 5 cefotaxime-resistant *E. coli* isolates from 25 beef cattle FYM samples, showing resistance to the antibiotics tested in the EUVSEC panel. *E. coli* isolates were picked up from RAPID'*E. coli* 2 agar plates with ciprofloxacin or cefotaxime added in their ECOFF concentrations for *E. coli* of 0.064 mg/L and 0.025 mg/L respectively.

| Manure type           | Antibiotic       | Number of ciprofloxacin-resistant <i>E. coli</i> resistant to the antibiotic listed (%) | Number of cefotaxime-resistant <i>E. coli</i> resistant to the antibiotic listed (%) |
|-----------------------|------------------|-----------------------------------------------------------------------------------------|--------------------------------------------------------------------------------------|
| fattening calf slurry | ampicillin       | 7 (100.0%)                                                                              | 6 (100.0%)                                                                           |
|                       | azithromycin     | 3 (42.9%)                                                                               | 3 (50.0%)                                                                            |
|                       | cefotaxime       | 2 (28.6%)                                                                               | 6 (100.0%)                                                                           |
|                       | ceftazidim       | 1 (14.3%)                                                                               | 6 (100.0%)                                                                           |
|                       | chloramphenicol  | 7 (100.0%)                                                                              | 5 (83.3%)                                                                            |
|                       | ciprofloxacin    | 7 (100.0%)                                                                              | 3 (50.0%)                                                                            |
|                       | colistin         | 2 (28.6%)                                                                               | 2 (33.3%)                                                                            |
|                       | gentamicin       | 6 (85.7%)                                                                               | 2 (33.3%)                                                                            |
|                       | meropenem        | 0 (0.0%)                                                                                | 0 (0.0%)                                                                             |
|                       | nalidixic acid   | 6 (85.7%)                                                                               | 3 (50.0%)                                                                            |
|                       | sulfamethoxazole | 7 (100.0%)                                                                              | 5 (83.3%)                                                                            |
|                       | tetracycline     | 6 (85.7%)                                                                               | 4 (66.7%)                                                                            |
|                       | tigecycline      | 0 (0.0%)                                                                                | 0 (0.0%)                                                                             |
|                       | trimethoprim     | 6 (85.7%)                                                                               | 4 (66.7%)                                                                            |
| beef cattle FYM       | ampicillin       | 6 (85.7%)                                                                               | 5 (100.0%)                                                                           |
|                       | azithromycin     | 0 (0.0%)                                                                                | 0 (0.0%)                                                                             |
|                       | cefotaxime       | 2 (28.6%)                                                                               | 5 (100.0%)                                                                           |
|                       | ceftazidim       | 2 (28.6%)                                                                               | 5 (100.0%)                                                                           |
|                       | chloramphenicol  | 5 (71.4%)                                                                               | 4 (80.0%)                                                                            |
|                       | ciprofloxacin    | 7 (100.0%)                                                                              | 2 (40.0%)                                                                            |
|                       | colistin         | 0 (0.0%)                                                                                | 0 (0.0%)                                                                             |
|                       | gentamicin       | 4 (57.1%)                                                                               | 1 (20.0%)                                                                            |
|                       | meropenem        | 0 (0.0%)                                                                                | 0 (0.0%)                                                                             |
|                       | nalidixic acid   | 5 (71.4%)                                                                               | 1 (20.0%)                                                                            |
|                       | sulfamethoxazole | 6 (85.7%)                                                                               | 4 (80.0%)                                                                            |
|                       | tetracycline     | 6 (85.7%)                                                                               | 4 (80.0%)                                                                            |
|                       | tigecycline      | 0 (0.0%)                                                                                | 0 (0.0%)                                                                             |
|                       | trimethoprim     | 6 (85.7%)                                                                               | 3 (60.0%)                                                                            |

**Table S2.** Resistance profile of ciprofloxacin-resistant *E. coli* isolates from 9 fattening calf slurry samples (number of isolates, n=7) and 25 beef cattle FYM samples (number of isolates, n=7). *E. coli* isolates were picked up from RAPID'*E. coli* 2 agar plates with ciprofloxacin added in the ECOFF concentration for *E. coli* of 0.064 mg/L.

| <b>Manure type</b>    | <b>Antibiotic Resistance Profile</b>    | <b>Number of ciprofloxacin-resistant <i>E. coli</i> (%)</b> |
|-----------------------|-----------------------------------------|-------------------------------------------------------------|
| fattening calf slurry | AMP&AZI&CHL&CIP&GEN&SMX&TET&TMP         | 1 (14.3)                                                    |
|                       | AMP&AZI&CHL&CIP&GEN&NAL&SMX&TET&TMP     | 2 (28.6)                                                    |
|                       | AMP&CHL&CIP&COL&GEN&NAL&SMX&TET&TMP     | 1 (14.3)                                                    |
|                       | AMP&FOT&CHL&CIP&NAL&SMX&TMP             | 1 (14.3)                                                    |
|                       | AMP&CHL&CIP&COL&GEN&NAL&SMX&TET         | 1 (14.3)                                                    |
|                       | AMP&FOT&TAZ&CHL&CIP&GEN&NAL&SMX&TET&TMP | 1 (14.3)                                                    |
| beef cattle FYM       | AMP&FOT&TAZ&CHL&CIP&GEN&NAL&SMX&TET&TMP | 2 (28.6)                                                    |
|                       | AMP&CHL&CIP&GEN&NAL&SMX&TET&TMP         | 2 (28.6)                                                    |
|                       | CIP&SMX&TET&TMP                         | 1 (14.3)                                                    |
|                       | AMP&CHL&CIP&NAL&SMX&TET&TMP             | 1 (14.3)                                                    |
|                       | AMP&CIP                                 | 1 (14.3)                                                    |

**Table S3.** Resistance profile in cefotaxime-resistant *E. coli* isolates from 9 fattening calf slurry samples (number of isolates, n=6) and 25 beef cattle FYM samples (number of isolates, n=5). *E. coli* isolates were picked up from RAPID'*E. coli* 2 agar plates with cefotaxime added in the ECOFF concentration for *E. coli* of 0.025 mg/L.

| <b>Manure type</b>    | <b>Antibiotic Resistance Profile</b>            | <b>Number of cefotaxime-resistant <i>E. coli</i> (%)</b> |
|-----------------------|-------------------------------------------------|----------------------------------------------------------|
| fattening calf slurry | AMP&FOT&TAZ&CHL&SMX                             | 1 (16.7)                                                 |
|                       | AMP&AZI&FOT&TAZ&CHL&CIP&COL&NAL&SMX&TET&TMP     | 1 (16.7)                                                 |
|                       | AMP&AZI&FOT&TAZ&CHL&CIP&COL&GEN&NAL&SMX&TET&TMP | 1 (16.7)                                                 |
|                       | AMP&FOT&TAZ&CHL&SMX&TET&TMP                     | 1 (16.7)                                                 |
|                       | AMP&FOT&TAZ                                     | 1 (16.7)                                                 |
|                       | AMP&AZI&FOT&TAZ&CHL&CIP&GEN&NAL&SMX&TET&TMP     | 1 (16.7)                                                 |
| beef cattle FYM       | AMP&FOT&TAZ&CHL&SMX&TET                         | 1 (20.0)                                                 |
|                       | AMP&FOT&TAZ&CHL&CIP&TET                         | 1 (20.0)                                                 |
|                       | AMP&FOT&TAZ&CHL&CIP&NAL&SMX&TMP                 | 1 (20.0)                                                 |
|                       | AMP&FOT&TAZ&CHL&GEN&SMX&TET&TMP                 | 1 (20.0)                                                 |
|                       | AMP&FOT&TAZ&SMX&TET&TMP                         | 1 (20.0)                                                 |
